# Supplementary material for: Neuropilin-1 is upregulated in the adaptive response of prostate tumors to androgen-targeted therapies and is prognostic of metastatic progression and patient mortality
Source: Springer Nature journal article supplement (doi:10.1038/onc.2016.482), 2017-01-16
Supplement: 41388_2017_BFonc2016482_MOESM6_ESM.xlsx [file 41388_2017_BFonc2016482_MOESM6_ESM.xlsx]

## Sheet: Sheet1
geneID	symbol	geneDescription	geneBiotype	geneChromosome	geneLocation
ENSG00000006282.17	SPATA20	spermatogenesis associated 20 [Source:HGNC Symbol;Acc:HGNC:26125]	protein_coding	17	chr17:50543058-50555852
ENSG00000021826.12	CPS1	carbamoyl-phosphate synthase 1, mitochondrial [Source:HGNC Symbol;Acc:HGNC:2323]	protein_coding	2	chr2:210477682-210679107
ENSG00000026559.11	KCNG1	potassium voltage-gated channel, subfamily G, member 1 [Source:HGNC Symbol;Acc:HGNC:6248]	protein_coding	20	chr20:51003656-51023129
ENSG00000044459.12	CNTLN	centlein, centrosomal protein [Source:HGNC Symbol;Acc:HGNC:23432]	protein_coding	9	chr9:17134982-17503923
ENSG00000047410.11	TPR	translocated promoter region, nuclear basket protein [Source:HGNC Symbol;Acc:HGNC:12017]	protein_coding	1	chr1:186311652-186375693
ENSG00000061936.7	SFSWAP	splicing factor, suppressor of white-apricot family [Source:HGNC Symbol;Acc:HGNC:10790]	protein_coding	12	chr12:131711081-131799737
ENSG00000082898.14	XPO1	exportin 1 [Source:HGNC Symbol;Acc:HGNC:12825]	protein_coding	2	chr2:61477849-61538626
ENSG00000084710.11	EFR3B	EFR3 homolog B (S. cerevisiae) [Source:HGNC Symbol;Acc:HGNC:29155]	protein_coding	2	chr2:25042130-25159137
ENSG00000099250.15	NRP1	neuropilin 1 [Source:HGNC Symbol;Acc:HGNC:8004]	protein_coding	10	chr10:33177492-33336262
ENSG00000100888.10	CHD8	chromodomain helicase DNA binding protein 8 [Source:HGNC Symbol;Acc:HGNC:20153]	protein_coding	14	chr14:21385194-21456126
ENSG00000101115.10	SALL4	spalt-like transcription factor 4 [Source:HGNC Symbol;Acc:HGNC:15924]	protein_coding	20	chr20:51784042-51802520
ENSG00000103260.6	METRN	meteorin, glial cell differentiation regulator [Source:HGNC Symbol;Acc:HGNC:14151]	protein_coding	16	chr16:715115-719655
ENSG00000105717.11	PBX4	pre-B-cell leukemia homeobox 4 [Source:HGNC Symbol;Acc:HGNC:13403]	protein_coding	19	chr19:19561707-19618916
ENSG00000106261.14	ZKSCAN1	zinc finger with KRAB and SCAN domains 1 [Source:HGNC Symbol;Acc:HGNC:13101]	protein_coding	7	chr7:100015572-100041689
ENSG00000106346.9	USP42	ubiquitin specific peptidase 42 [Source:HGNC Symbol;Acc:HGNC:20068]	protein_coding	7	chr7:6104884-6161564
ENSG00000106689.8	LHX2	LIM homeobox 2 [Source:HGNC Symbol;Acc:HGNC:6594]	protein_coding	9	chr9:124001670-124033301
ENSG00000107731.10	UNC5B	unc-5 homolog B (C. elegans) [Source:HGNC Symbol;Acc:HGNC:12568]	protein_coding	10	chr10:71212570-71302864
ENSG00000108379.7	WNT3	wingless-type MMTV integration site family, member 3 [Source:HGNC Symbol;Acc:HGNC:12782]	protein_coding	17	chr17:46762506-46833154
ENSG00000113391.14	FAM172A	family with sequence similarity 172, member A [Source:HGNC Symbol;Acc:HGNC:25365]	protein_coding	5	chr5:93618069-94111699
ENSG00000114770.14	ABCC5	ATP-binding cassette, sub-family C (CFTR/MRP), member 5 [Source:HGNC Symbol;Acc:HGNC:56]	protein_coding	3	chr3:183919934-184018015
ENSG00000117461.12;ENSG00000278139.1	PIK3R3;RP4-533D7.6	phosphoinositide-3-kinase, regulatory subunit 3 (gamma) [Source:HGNC Symbol;Acc:HGNC:8981];Phosphatidylinositol 3-kinase regulatory subunit gamma [Source:UniProtKB/TrEMBL;Acc:F6TDL0]	protein_coding	1	chr1:46040140-46133036;chr1:46043661-46176488
ENSG00000118058.18	KMT2A	lysine (K)-specific methyltransferase 2A [Source:HGNC Symbol;Acc:HGNC:7132]	protein_coding	11	chr11:118436490-118526832
ENSG00000121413.10	ZSCAN18	zinc finger and SCAN domain containing 18 [Source:HGNC Symbol;Acc:HGNC:21037]	protein_coding	19	chr19:58083838-58118427
ENSG00000122778.7	KIAA1549	KIAA1549 [Source:HGNC Symbol;Acc:HGNC:22219]	protein_coding	7	chr7:138831381-138981318
ENSG00000124496.10	TRERF1	transcriptional regulating factor 1 [Source:HGNC Symbol;Acc:HGNC:18273]	protein_coding	6	chr6:42224931-42452051
ENSG00000125354.20	SEPT6	septin 6 [Source:HGNC Symbol;Acc:HGNC:15848]	protein_coding	X	chrX:119615724-119693370
ENSG00000125676.17	THOC2	THO complex 2 [Source:HGNC Symbol;Acc:HGNC:19073]	protein_coding	X	chrX:123600561-123733056
ENSG00000127616.15	SMARCA4	SWI/SNF related, matrix associated, actin dependent regulator of chromatin, subfamily a, member 4 [Source:HGNC Symbol;Acc:HGNC:11100]	protein_coding	19	chr19:10961001-11065395
ENSG00000132549.16	VPS13B	vacuolar protein sorting 13 homolog B (yeast) [Source:HGNC Symbol;Acc:HGNC:2183]	protein_coding	8	chr8:99013266-99877580
ENSG00000132780.14	NASP	nuclear autoantigenic sperm protein (histone-binding) [Source:HGNC Symbol;Acc:HGNC:7644]	protein_coding	1	chr1:45583846-45618904
ENSG00000133466.11	C1QTNF6	C1q and tumor necrosis factor related protein 6 [Source:HGNC Symbol;Acc:HGNC:14343]	protein_coding	22	chr22:37180167-37199385
ENSG00000133624.11	ZNF767P	zinc finger family member 767, pseudogene [Source:HGNC Symbol;Acc:HGNC:21884]	transcribed_unprocessed_pseudogene	7	chr7:149547154-149624752
ENSG00000134013.13	LOXL2	lysyl oxidase-like 2 [Source:HGNC Symbol;Acc:HGNC:6666]	protein_coding	8	chr8:23297189-23425328
ENSG00000134369.13	NAV1	neuron navigator 1 [Source:HGNC Symbol;Acc:HGNC:15989]	protein_coding	1	chr1:201622885-201826969
ENSG00000134909.16	ARHGAP32	Rho GTPase activating protein 32 [Source:HGNC Symbol;Acc:HGNC:17399]	protein_coding	11	chr11:128965060-129279324
ENSG00000135116.7	HRK	harakiri, BCL2 interacting protein [Source:HGNC Symbol;Acc:HGNC:5185]	protein_coding	12	chr12:116856144-116881441
ENSG00000136709.9	WDR33	WD repeat domain 33 [Source:HGNC Symbol;Acc:HGNC:25651]	protein_coding	2	chr2:127701022-127811187
ENSG00000144560.11	VGLL4	vestigial-like family member 4 [Source:HGNC Symbol;Acc:HGNC:28966]	protein_coding	3	chr3:11556070-11771350
ENSG00000145506.11	NKD2	naked cuticle homolog 2 (Drosophila) [Source:HGNC Symbol;Acc:HGNC:17046]	protein_coding	5	chr5:1008829-1038943
ENSG00000147548.14	WHSC1L1	Wolf-Hirschhorn syndrome candidate 1-like 1 [Source:HGNC Symbol;Acc:HGNC:12767]	protein_coding	8	chr8:38269697-38382272
ENSG00000150636.13	CCDC102B	coiled-coil domain containing 102B [Source:HGNC Symbol;Acc:HGNC:26295]	protein_coding	18	chr18:68715209-69055189
ENSG00000153187.14	HNRNPU	heterogeneous nuclear ribonucleoprotein U (scaffold attachment factor A) [Source:HGNC Symbol;Acc:HGNC:5048]	protein_coding	1	chr1:244851166-244864542
ENSG00000157657.12	ZNF618	zinc finger protein 618 [Source:HGNC Symbol;Acc:HGNC:29416]	protein_coding	9	chr9:113876282-114056591
ENSG00000157851.14	DPYSL5	dihydropyrimidinase-like 5 [Source:HGNC Symbol;Acc:HGNC:20637]	protein_coding	2	chr2:26847747-26950351
ENSG00000159788.16	RGS12	regulator of G-protein signaling 12 [Source:HGNC Symbol;Acc:HGNC:9994]	protein_coding	4	chr4:3293028-3439913
ENSG00000160298.15	C21orf58	chromosome 21 open reading frame 58 [Source:HGNC Symbol;Acc:HGNC:1300]	protein_coding	21	chr21:46300181-46323875
ENSG00000160953.12	MUM1	melanoma associated antigen (mutated) 1 [Source:HGNC Symbol;Acc:HGNC:29641]	protein_coding	19	chr19:1354711-1378431
ENSG00000162545.5	CAMK2N1	calcium/calmodulin-dependent protein kinase II inhibitor 1 [Source:HGNC Symbol;Acc:HGNC:24190]	protein_coding	1	chr1:20482391-20486220
ENSG00000163872.13	YEATS2	YEATS domain containing 2 [Source:HGNC Symbol;Acc:HGNC:25489]	protein_coding	3	chr3:183697818-183812625
ENSG00000165655.15	ZNF503	zinc finger protein 503 [Source:HGNC Symbol;Acc:HGNC:23589]	protein_coding	10	chr10:75397830-75401906
ENSG00000165684.3	SNAPC4	small nuclear RNA activating complex, polypeptide 4, 190kDa [Source:HGNC Symbol;Acc:HGNC:11137]	protein_coding	9	chr9:136375577-136398797
ENSG00000167216.14	KATNAL2	katanin p60 subunit A-like 2 [Source:HGNC Symbol;Acc:HGNC:25387]	protein_coding	18	chr18:46917492-47102243
ENSG00000167280.14	ENGASE	endo-beta-N-acetylglucosaminidase [Source:HGNC Symbol;Acc:HGNC:24622]	protein_coding	17	chr17:79074939-79088599
ENSG00000167371.14	PRRT2	proline-rich transmembrane protein 2 [Source:HGNC Symbol;Acc:HGNC:30500]	protein_coding	16	chr16:29811856-29815880
ENSG00000168488.16	ATXN2L	ataxin 2-like [Source:HGNC Symbol;Acc:HGNC:31326]	protein_coding	16	chr16:28823035-28837237
ENSG00000168785.5	TSPAN5	tetraspanin 5 [Source:HGNC Symbol;Acc:HGNC:17753]	protein_coding	4	chr4:98470367-98658629
ENSG00000171634.14	BPTF	bromodomain PHD finger transcription factor [Source:HGNC Symbol;Acc:HGNC:3581]	protein_coding	17	chr17:67825524-67984378
ENSG00000171988.15	JMJD1C	jumonji domain containing 1C [Source:HGNC Symbol;Acc:HGNC:12313]	protein_coding	10	chr10:63167221-63465881
ENSG00000172361.5	CCDC11	coiled-coil domain containing 11 [Source:HGNC Symbol;Acc:HGNC:26530]	protein_coding	18	chr18:50227193-50266522
ENSG00000173905.6	GOLIM4	golgi integral membrane protein 4 [Source:HGNC Symbol;Acc:HGNC:15448]	protein_coding	3	chr3:168008677-168095975
ENSG00000176842.12	IRX5	iroquois homeobox 5 [Source:HGNC Symbol;Acc:HGNC:14361]	protein_coding	16	chr16:54930862-54934485
ENSG00000178252.15	WDR6	WD repeat domain 6 [Source:HGNC Symbol;Acc:HGNC:12758]	protein_coding	3	chr3:49007062-49015953
ENSG00000178498.13	DTX3	deltex 3, E3 ubiquitin ligase [Source:HGNC Symbol;Acc:HGNC:24457]	protein_coding	12	chr12:57604622-57609804
ENSG00000179348.9	GATA2	GATA binding protein 2 [Source:HGNC Symbol;Acc:HGNC:4171]	protein_coding	3	chr3:128479427-128493185
ENSG00000180806.4	HOXC9	homeobox C9 [Source:HGNC Symbol;Acc:HGNC:5130]	protein_coding	12	chr12:53994895-54003337
ENSG00000182979.15	MTA1	metastasis associated 1 [Source:HGNC Symbol;Acc:HGNC:7410]	protein_coding	14	chr14:105419820-105470729
ENSG00000184428.10	TOP1MT	topoisomerase (DNA) I, mitochondrial [Source:HGNC Symbol;Acc:HGNC:29787]	protein_coding	8	chr8:143304384-143359979
ENSG00000196405.10	EVL	Enah/Vasp-like [Source:HGNC Symbol;Acc:HGNC:20234]	protein_coding	14	chr14:99971449-100144236
ENSG00000204946.7;ENSG00000244560.4	ZNF783;RP4-800G7.2	zinc finger family member 783 [Source:HGNC Symbol;Acc:HGNC:27222];	protein_coding;transcribed_unprocessed_pseudogene	7	chr7:149262171-149297302;chr7:149285281-149297312
ENSG00000230124.4	LHX4-AS1	LHX4 antisense RNA 1 [Source:HGNC Symbol;Acc:HGNC:40982]	protein_coding	1	chr1:180269653-180502954
ENSG00000241978.7	AKAP2	A kinase (PRKA) anchor protein 2 [Source:HGNC Symbol;Acc:HGNC:372]	protein_coding	9	chr9:110048598-110172512
ENSG00000273615.1	RP11-1136G4.2		lincRNA	16	chr16:54851640-54852733
ENSG00000275389.1	RP11-214K3.24		lincRNA	12	chr12:124085761-124088598
ENSG00000008256.13	CYTH3	cytohesin 3 [Source:HGNC Symbol;Acc:HGNC:9504]	protein_coding	7	chr7:6161776-6272644
ENSG00000071246.8	VASH1	vasohibin 1 [Source:HGNC Symbol;Acc:HGNC:19964]	protein_coding	14	chr14:76762189-76783015
ENSG00000074410.11	CA12	carbonic anhydrase XII [Source:HGNC Symbol;Acc:HGNC:1371]	protein_coding	15	chr15:63321378-63382161
ENSG00000084774.11	CAD	carbamoyl-phosphate synthetase 2, aspartate transcarbamylase, and dihydroorotase [Source:HGNC Symbol;Acc:HGNC:1424]	protein_coding	2	chr2:27217390-27243943
ENSG00000091127.11	PUS7	pseudouridylate synthase 7 (putative) [Source:HGNC Symbol;Acc:HGNC:26033]	protein_coding	7	chr7:105439661-105522267
ENSG00000111276.8	CDKN1B	cyclin-dependent kinase inhibitor 1B (p27, Kip1) [Source:HGNC Symbol;Acc:HGNC:1785]	protein_coding	12	chr12:12715058-12722371
ENSG00000126001.13	CEP250	centrosomal protein 250kDa [Source:HGNC Symbol;Acc:HGNC:1859]	protein_coding	20	chr20:35455164-35519280
ENSG00000127483.15	HP1BP3	heterochromatin protein 1, binding protein 3 [Source:HGNC Symbol;Acc:HGNC:24973]	protein_coding	1	chr1:20742661-20787323
ENSG00000128266.8	GNAZ	guanine nucleotide binding protein (G protein), alpha z polypeptide [Source:HGNC Symbol;Acc:HGNC:4395]	protein_coding	22	chr22:23070361-23125037
ENSG00000131242.13	RAB11FIP4	RAB11 family interacting protein 4 (class II) [Source:HGNC Symbol;Acc:HGNC:30267]	protein_coding	17	chr17:31391624-31538217
ENSG00000137261.11	KIAA0319	KIAA0319 [Source:HGNC Symbol;Acc:HGNC:21580]	protein_coding	6	chr6:24544104-24646155
ENSG00000140332.13	TLE3	transducin-like enhancer of split 3 [Source:HGNC Symbol;Acc:HGNC:11839]	protein_coding	15	chr15:70047790-70098176
ENSG00000141391.11	SLMO1	slowmo homolog 1 (Drosophila) [Source:HGNC Symbol;Acc:HGNC:24639]	protein_coding	18	chr18:12407896-12432238
ENSG00000143924.16	EML4	echinoderm microtubule associated protein like 4 [Source:HGNC Symbol;Acc:HGNC:1316]	protein_coding	2	chr2:42169350-42332548
ENSG00000158258.13	CLSTN2	calsyntenin 2 [Source:HGNC Symbol;Acc:HGNC:17448]	protein_coding	3	chr3:139935185-140577397
ENSG00000167394.10	ZNF668	zinc finger protein 668 [Source:HGNC Symbol;Acc:HGNC:25821]	protein_coding	16	chr16:31060843-31074320
ENSG00000167889.10	MGAT5B	mannosyl (alpha-1,6-)-glycoprotein beta-1,6-N-acetyl-glucosaminyltransferase, isozyme B [Source:HGNC Symbol;Acc:HGNC:24140]	protein_coding	17	chr17:76868456-76950393
ENSG00000169155.7	ZBTB43	zinc finger and BTB domain containing 43 [Source:HGNC Symbol;Acc:HGNC:17908]	protein_coding	9	chr9:126805006-126838210
ENSG00000175445.12	LPL	lipoprotein lipase [Source:HGNC Symbol;Acc:HGNC:6677]	protein_coding	8	chr8:19901717-19967258
ENSG00000180914.8	OXTR	oxytocin receptor [Source:HGNC Symbol;Acc:HGNC:8529]	protein_coding	3	chr3:8750408-8769628
ENSG00000181350.9	LRRC75A	leucine rich repeat containing 75A [Source:HGNC Symbol;Acc:HGNC:32403]	protein_coding	17	chr17:16441577-16492153
ENSG00000186472.17	PCLO	piccolo presynaptic cytomatrix protein [Source:HGNC Symbol;Acc:HGNC:13406]	protein_coding	7	chr7:82754013-83162930
ENSG00000196090.10	PTPRT	protein tyrosine phosphatase, receptor type, T [Source:HGNC Symbol;Acc:HGNC:9682]	protein_coding	20	chr20:42072752-43189970
ENSG00000198743.5	SLC5A3	solute carrier family 5 (sodium/myo-inositol cotransporter), member 3 [Source:HGNC Symbol;Acc:HGNC:11038]	protein_coding	21	chr21:34073570-34106260
ENSG00000204580.9	DDR1	discoidin domain receptor tyrosine kinase 1 [Source:HGNC Symbol;Acc:HGNC:2730]	protein_coding	6	chr6:30876421-30900156
ENSG00000255337.1	RP11-315O6.1		antisense	11	chr11:102452919-102462008
ENSG00000015133.16	CCDC88C	coiled-coil domain containing 88C [Source:HGNC Symbol;Acc:HGNC:19967]	protein_coding	14	chr14:91271323-91417844
ENSG00000054654.13	SYNE2	spectrin repeat containing, nuclear envelope 2 [Source:HGNC Symbol;Acc:HGNC:17084]	protein_coding	14	chr14:63852983-64226433
ENSG00000055163.16	CYFIP2	cytoplasmic FMR1 interacting protein 2 [Source:HGNC Symbol;Acc:HGNC:13760]	protein_coding	5	chr5:157266079-157395598
ENSG00000071082.8	RPL31	ribosomal protein L31 [Source:HGNC Symbol;Acc:HGNC:10334]	protein_coding	2	chr2:101001715-101024032
ENSG00000072864.10	NDE1	nudE neurodevelopment protein 1 [Source:HGNC Symbol;Acc:HGNC:17619]	protein_coding	16	chr16:15643267-15726353
ENSG00000103257.6	SLC7A5	solute carrier family 7 (amino acid transporter light chain, L system), member 5 [Source:HGNC Symbol;Acc:HGNC:11063]	protein_coding	16	chr16:87830023-87869488
ENSG00000109685.15	WHSC1	Wolf-Hirschhorn syndrome candidate 1 [Source:HGNC Symbol;Acc:HGNC:12766]	protein_coding	4	chr4:1871424-1982207
ENSG00000112414.12	GPR126	G protein-coupled receptor 126 [Source:HGNC Symbol;Acc:HGNC:13841]	protein_coding	6	chr6:142301854-142446266
ENSG00000116117.15	PARD3B	par-3 family cell polarity regulator beta [Source:HGNC Symbol;Acc:HGNC:14446]	protein_coding	2	chr2:204545793-205620162
ENSG00000124508.14	BTN2A2	butyrophilin, subfamily 2, member A2 [Source:HGNC Symbol;Acc:HGNC:1137]	protein_coding	6	chr6:26383096-26394874
ENSG00000132182.9	NUP210	nucleoporin 210kDa [Source:HGNC Symbol;Acc:HGNC:30052]	protein_coding	3	chr3:13316235-13420309
ENSG00000133706.15	LARS	leucyl-tRNA synthetase [Source:HGNC Symbol;Acc:HGNC:6512]	protein_coding	5	chr5:146113038-146182660
ENSG00000137411.14	VARS2	valyl-tRNA synthetase 2, mitochondrial [Source:HGNC Symbol;Acc:HGNC:21642]	protein_coding	6	chr6:30908242-30926459
ENSG00000151849.12	CENPJ	centromere protein J [Source:HGNC Symbol;Acc:HGNC:17272]	protein_coding	13	chr13:24882284-24922889
ENSG00000163083.5	INHBB	inhibin, beta B [Source:HGNC Symbol;Acc:HGNC:6067]	protein_coding	2	chr2:120346143-120351808
ENSG00000163808.14	KIF15	kinesin family member 15 [Source:HGNC Symbol;Acc:HGNC:17273]	protein_coding	3	chr3:44761717-44873376
ENSG00000165209.16	STRBP	spermatid perinuclear RNA binding protein [Source:HGNC Symbol;Acc:HGNC:16462]	protein_coding	9	chr9:123109500-123268576
ENSG00000173218.12	VANGL1	VANGL planar cell polarity protein 1 [Source:HGNC Symbol;Acc:HGNC:15512]	protein_coding	1	chr1:115641953-115698224
ENSG00000178773.12	CPNE7	copine VII [Source:HGNC Symbol;Acc:HGNC:2320]	protein_coding	16	chr16:89575768-89597246
ENSG00000196132.9	MYT1	myelin transcription factor 1 [Source:HGNC Symbol;Acc:HGNC:7622]	protein_coding	20	chr20:64151791-64242253
ENSG00000258986.4	TMEM179	transmembrane protein 179 [Source:HGNC Symbol;Acc:HGNC:20137]	protein_coding	14	chr14:104474678-104605647
